# Supplementary material for: Outcomes of salvage radical prostatectomy after initial irreversible electroporation treatment for recurrent prostate cancer
Source: PubMed Central journal article supplement — BJU Int. 2022 May 13;130(5):611–8. doi: 10.1111/bju.15759 (PMC9790506; doi:10.1111/bju.15759), 2022-05-13
Supplement: BJU-130-611-s001.pdf [file BJU-130-611-s001.pdf]

**Supplementary table. Patient characteristics at time of salvage radical prostatectomy (sRP) following IRE treatment.**

| <b>Variable</b>                                     | <b>Value</b>    |
|-----------------------------------------------------|-----------------|
| <b>Number of patients, n (%)</b>                    | 39 (100)        |
| <b>Time to recurrence, months, median (IQR)</b>     | 14.3 (9.1-38.8) |
| <b>PSA level at recurrence, ng/mL, median (IQR)</b> | 6.0 (3.4-8)     |
| <b>Prostate volume, mL, mean (SD)</b>               | 39.6 (20.2)     |
| <b>ISUP GG, n (%)</b>                               |                 |
| 1                                                   | 7 (18)          |
| 2                                                   | 20 (51.3)       |
| 3                                                   | 8 (20.5)        |
| 4                                                   | 2 (5.1)         |
| 5                                                   | 2 (5.1)         |
| <b>Number of biopsy cores, median (IQR)</b>         | 30 (18-35)      |
| <b>Number of positives cores, median (IQR)</b>      | 4 (2-6)         |
| <b>T-staging, n (%)</b>                             |                 |
| T1c                                                 | 18 (46.2)       |
| T2a-b                                               | 15 (38.5)       |
| T2c                                                 | 6 (15.4)        |
| <b>d'Amico risk classification, n (%)</b>           |                 |
| Low-risk disease                                    | 4 (10.3)        |
| Intermediate-risk disease                           | 28 (71.8)       |
| High-risk disease                                   | 7 (18.0)        |

**Abbreviations:** ISUP GG = International Society of Urological Pathology grade group and PSA = Prostate Specific Antigen.
